# Supplementary material for: Eco-sustainable paper wastewater management by water-resource recovery and concentrate minimization using a membrane oxidation reactor and membrane distillation system
Source: Royal Society of Chemistry journal article supplement (doi:10.1039/d3ew00520h), 2023-01-01
Supplement: d3ew00520h1.pdf [file d3ew00520h1.pdf]

**Supplementary Table 1.** Measurement methods of parameters

| Parameter                        | Unit                    | Methods                                                                                                |
|----------------------------------|-------------------------|--------------------------------------------------------------------------------------------------------|
| pH                               | -                       | Hach HQ440d (Hach-Lange GmbH) multiparameter                                                           |
| Temperature                      | °C                      | Hach HQ440d (Hach-Lange GmbH) multiparameter                                                           |
| $E_i$                            | $\mu\text{S}/\text{cm}$ | Hach HQ440d (Hach-Lange GmbH) multiparameter                                                           |
| TDS (Total Dissolved Solids)     | mg/L                    | Hach HQ440d (Hach-Lange GmbH) multiparameter                                                           |
| DO (Dissolved Oxygen)            | mg/L                    | Hach HQ440d (Hach-Lange GmbH) multiparameter                                                           |
| COD (Chemical Oxygen Demand)     | mg/L                    | 5220-C closed reflux titration method                                                                  |
| TOC (Total Organic Carbon)       | mg/L                    | 5310-B high temperature catalytic oxidation method (Teledyne Tekmar analyzer)                          |
| SS (Suspended Solid)             | mg/L                    | drying at about 103–105 °C in accordance with 2540-D gravimetric method                                |
| AOX (Adsorbable Organic Halogen) | mg/L                    | 5910 B: UV Absorption method (LZC390/LCK390 AOX)                                                       |
| Turbidity                        | NTU                     | 2310-B Nephelometric method (Hach 2100Q portable turbidimeter)                                         |
| Ammonium                         | mg/L                    | 4500-NH <sub>3</sub> B. Preliminary distillation method                                                |
| Color                            | $\lambda$ :436 nm       | 2120-C spectrophotometric method (Hach DR6000 UV VIS spectrophotometer)                                |
|                                  | $\lambda$ :525 nm       |                                                                                                        |
|                                  | $\lambda$ :620 nm       |                                                                                                        |
| NO <sub>3</sub> <sup>2-</sup>    | mg/L                    | 4500-NO <sub>3</sub> <sup>2-</sup> -C spectrophotometric method (Hach DR6000 UV VIS spectrophotometer) |
| SO <sub>4</sub> <sup>2-</sup>    | mg/L                    | 4500-D turbidity method (Hach DR6000 UV VIS spectrophotometer)                                         |
| Cl <sup>-</sup>                  | mg/L                    | 4500-E potentiometric methods (Hach DR6000 UV VIS spectrophotometer)                                   |
| Fe <sup>2+</sup>                 | mg/L                    | Specthrometric Fe <sup>2+</sup> analysis (Hach DR6000 UV VIS spectrophotometer)                        |
| Fe <sup>3+</sup>                 | mg/L                    | Specthrometric Fe <sup>3+</sup> analysis (Hach DR6000 UV VIS spectrophotometer)                        |
| Total Nitrogen                   | mg/L                    | LCK 330 Hach Lange test kits (Hach DR6000 UV VIS spectrophotometer)                                    |
| Total Hardness                   | mg/L                    | 2340C-EDTA titrimetric method                                                                          |
| Total Phenol                     | mg/L                    | 5530-C chloroform extraction method                                                                    |

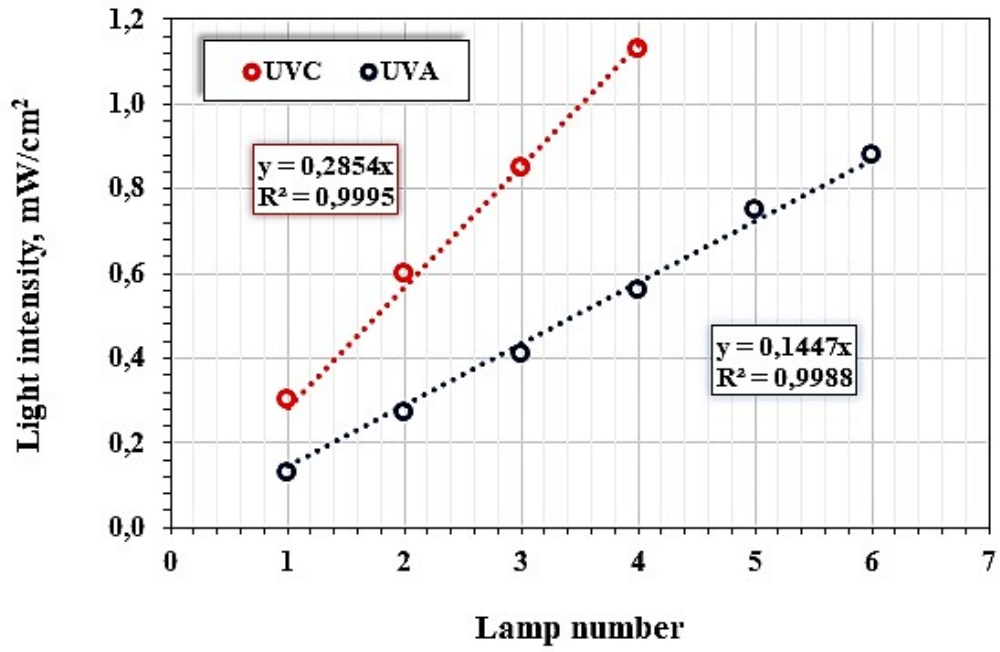

**Supplementary Figure 1.** Variations of intensity of light versus lamp number in lab-pilot scale MOR.

**Supplementary Table 2.** The operating conditions optimized for Fenton and Photo-Fenton (UVA<sub>365</sub> and UVC<sub>254</sub>) enhanced UF hybrid systems

| Parameters                                      | Unit                   | Fenton<br>Enhanced UF | UVA <sub>365</sub><br>Enhanced UF | UVC <sub>254</sub><br>Enhanced UF |
|-------------------------------------------------|------------------------|-----------------------|-----------------------------------|-----------------------------------|
| Process time, $t$                               | min                    | 56                    | 42                                | 60                                |
| Temperature, $T$                                | °C                     | 39.1                  | 30.7                              | 40                                |
| pH                                              | –                      | 3.88                  | 3.0                               | 5.0                               |
| H <sub>2</sub> O <sub>2</sub> /TOC              | g/g                    | 6.0                   | 9.4                               | 6.0                               |
| H <sub>2</sub> O <sub>2</sub> /Fe <sup>2+</sup> | g/g                    | 11.1                  | 6.0                               | 7.0                               |
| Aeration rate, $v_A$                            | L/min                  | 2.56                  | 3.0                               | 2.0                               |
| Vacuum rate, $v_W^e$                            | rpm (mL/min)           | 55.0                  | 55.0                              | 55.0                              |
| UF membrane type                                | –                      | UH050                 | UP020                             | UH050                             |
| Lamp number, $I_L$                              |                        | -                     | 3                                 | 4                                 |
| Intensity of light                              | mW/cm <sup>2</sup> (W) | –                     | 0.4<br>(60)                       | 0.6<br>(80)                       |

**Supplementary Table 3.** Per round and total operational activities and operational MD concentrate recycle order for integrated {MOR}-[MD] systems.

| Hybrid MOR treatment           | Integrated UF membrane | Operation per treatment tour |                |                | Total MOR operation |
|--------------------------------|------------------------|------------------------------|----------------|----------------|---------------------|
|                                |                        | I. round                     | II. round      | III. round     |                     |
| Fenton enhanced {MOR}-[MD]     | [UH050]                | 9<br>(504 min)               | 6<br>(336 min) | 4<br>(224 min) | 19<br>(1064 min)    |
| UVA-Fenton enhanced {MOR}-[MD] | [UP020]                | 14<br>(588 min)              | 9<br>(378 min) | 6<br>(252 min) | 29<br>1218 min      |
| UVC-Fenton enhanced {MOR}-[MD] | [UH050]                | 8<br>(480 min)               | 5<br>(300 min) | 4<br>(240 min) | 17<br>1020 min      |

MD concentrate recirculation

MD concentrate recirculation

**Supplementary Table 4.** Lab-pilot scale operating conditions in the MOR process.

| MOR treatment                         | Parameters                                     | Values |
|---------------------------------------|------------------------------------------------|--------|
| Fenton                                | Total Operating Time (h)                       | 17.7   |
|                                       | Number of Operation                            | 19     |
|                                       | Addition of raw wastewater to the reactor (L)  | 26     |
|                                       | Volume of water withdrawn from the reactor (L) | 15     |
|                                       | MD concentrated recycle (L)                    | 4      |
|                                       | HRT (h)                                        | 2      |
| Photo-Fenton<br>(UVA <sub>365</sub> ) | Total Operating Time (h)                       | 20.3   |
|                                       | Number of Operation                            | 29     |
|                                       | Addition of raw wastewater to the reactor (L)  | 26     |
|                                       | Volume of water withdrawn from the reactor (L) | 15     |
|                                       | MD concentrated recycle (L)                    | 4      |
|                                       | HRT (h)                                        | 2      |
| Photo-Fenton<br>(UVC <sub>254</sub> ) | Total Operating Time (h)                       | 17     |
|                                       | Number of Operation                            | 17     |
|                                       | Addition of raw wastewater to the reactor (L)  | 26     |
|                                       | Volume of water withdrawn from the reactor (L) | 15     |
|                                       | MD concentrated recycle (L)                    | 4      |
|                                       | HRT (h)                                        | 2      |
